# Supplementary material for: UiO-66 MOF-Derived Ru@ZrO2 Catalysts for Photo-Thermal CO2 Hydrogenation
Source: MDPI journal article supplement (doi:10.3390/chemistry5020051), 2023-03-25
Supplement: s1 [file s1]

---

## *Supplementary Information*

# UiO-66 MOF-Derived Ru@ZrO<sub>2</sub> Catalysts for Photo-Thermal CO<sub>2</sub> Hydrogenation

Fernando Almazán<sup>1</sup>, Marta Lafuente<sup>2</sup>, Amaya Echarte<sup>1</sup>, Mikel Imizcoz<sup>1</sup>, Ismael Pellejero<sup>1,\*</sup> and Luis M. Gandía<sup>1,\*</sup>

<sup>1</sup> Institute for Advanced Materials and Mathematics (InaMat<sup>2</sup>), Universidad Pública de Navarra (UPNA), Edificio Jerónimo de Ayanz, Campus de Arrosadia, 31006 Pamplona-Iruña, Spain.

<sup>2</sup> Universidad de Zaragoza (UNIZAR) Campus San Francisco, 50014, Zaragoza, Spain.

\* Correspondence: ismael.pellejero@unavarra.es (I.P.); lgandia@unavarra.es (L.M.G.).

---

Table of contents

Figure S1: SEM image and EDX analysis map of Ru<sub>0.10</sub>UiO-66 MOF.

Figure S2: FTIR spectra of the Ru-loaded UiO-66 (Ru<sub>x</sub>UiO-66) and the Ru<sub>x</sub>@ZrO<sub>2</sub> catalysts obtained after calcination at 400, 500 and 600 °C.

Figure S3. TEM images and EDX analysis of the MOF-derived catalysts: (A) Ru<sub>0.10</sub>@ZrO<sub>2</sub>-400°C, (B) Ru<sub>0.10</sub>@ZrO<sub>2</sub>-500°C, (C) Ru<sub>0.10</sub>@ZrO<sub>2</sub>-600°C, and (D) Ru<sub>0.03</sub>@ZrO<sub>2</sub>-600°C.

Figure S4: Simulated XRD pattern of the monoclinic and cubic phases of the ZrO<sub>2</sub>.

Figure S5 Derivative TGA curves of the Ru<sub>x</sub>@ZrO<sub>2</sub> catalysts calcined at 400 and 500 °C.

Figure S6: Spectral power distribution of ultra-high power LEDM-5500 White HP - Pyroistech S.L.

---

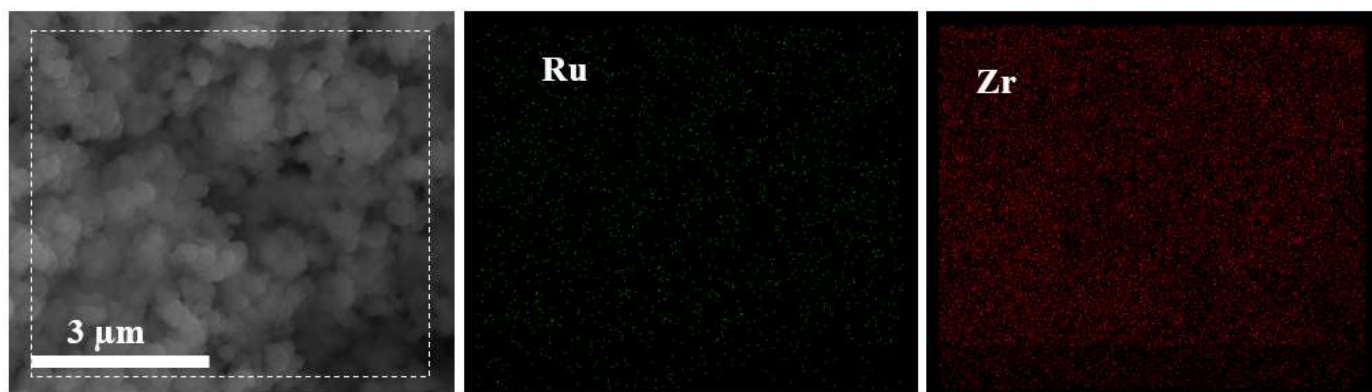

**Figure S1.** SEM image and EDX analysis map of Ru<sub>0.10</sub>UiO-66 MOF.

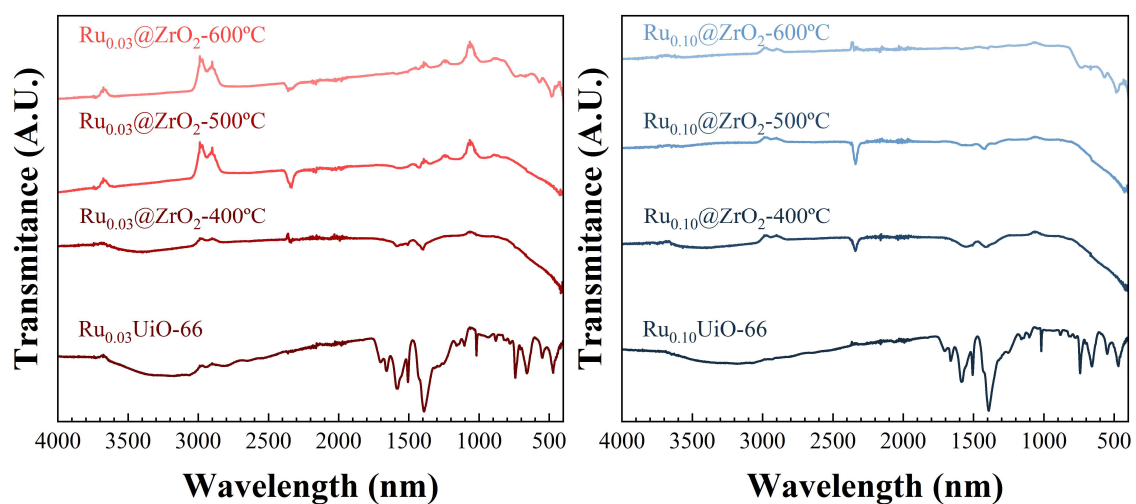

**Figure S2.** FTIR spectra of the Ru-loaded UiO-66 (Ru<sub>x</sub>UiO-66) and the Ru<sub>x</sub>@ZrO<sub>2</sub> catalysts obtained after calcination at 400, 500 and 600 °C.

(A) TEM-EDX: Ru<sub>0.10</sub>@ZrO<sub>2</sub>-400°C

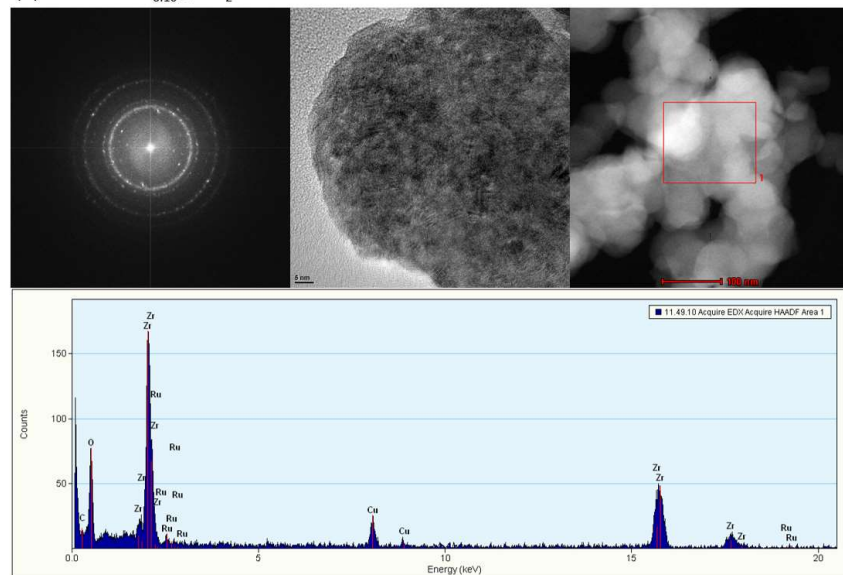

(B) TEM-EDX: Ru<sub>0.10</sub>@ZrO<sub>2</sub>-500°C

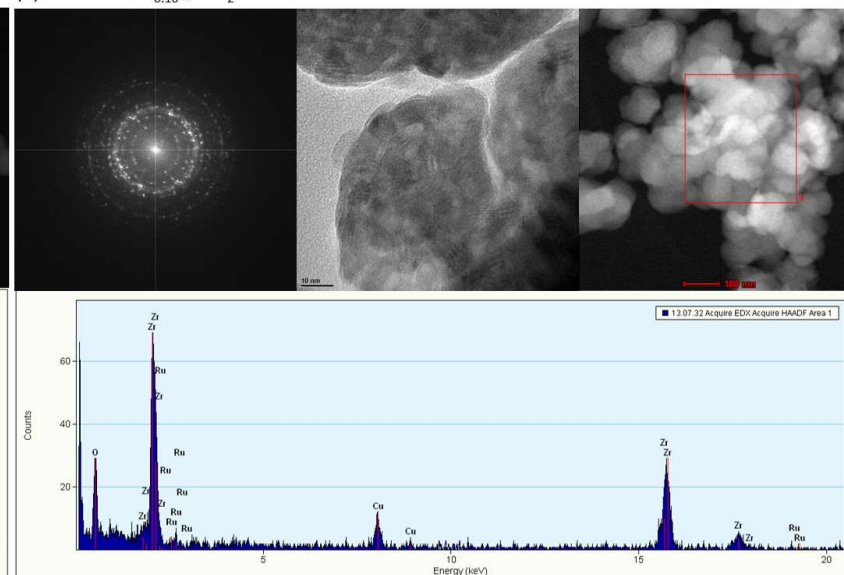

(C) TEM-EDX: Ru<sub>0.10</sub>@ZrO<sub>2</sub>-600°C

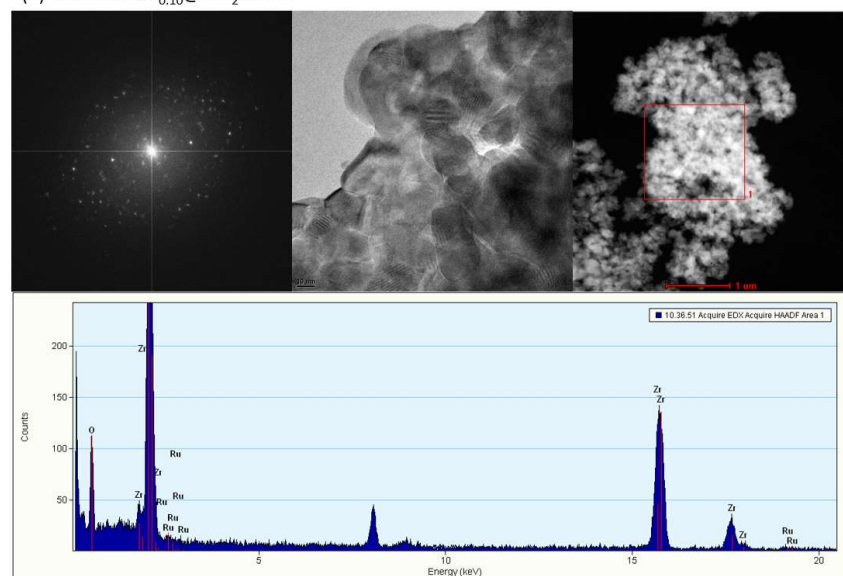

(D) TEM-EDX: Ru<sub>0.03</sub>@ZrO<sub>2</sub>-600°C

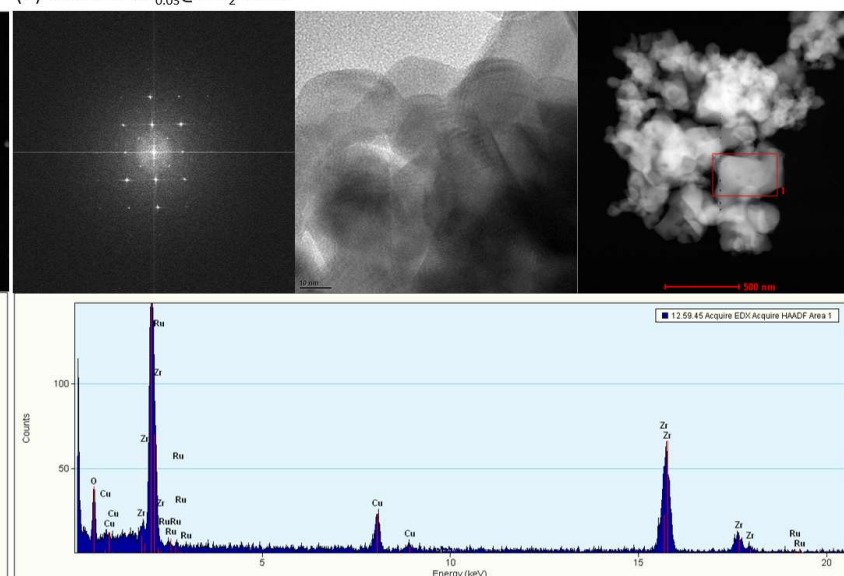

Figure S3. TEM images and EDX analysis of the MOF-derived catalysts: (A) Ru<sub>0.10</sub>@ZrO<sub>2</sub>-400°C, (B) Ru<sub>0.10</sub>@ZrO<sub>2</sub>-500°C, (C) Ru<sub>0.10</sub>@ZrO<sub>2</sub>-600°C, and (D) Ru<sub>0.03</sub>@ZrO<sub>2</sub>-600°C..

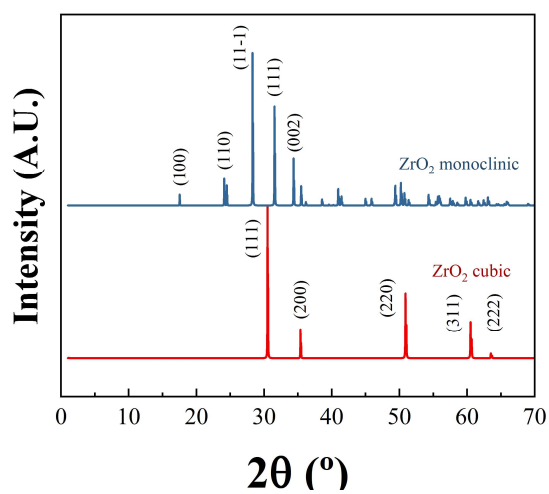

Figure S4: Simulated XRD pattern of the monoclinic and cubic phases of the ZrO<sub>2</sub>.

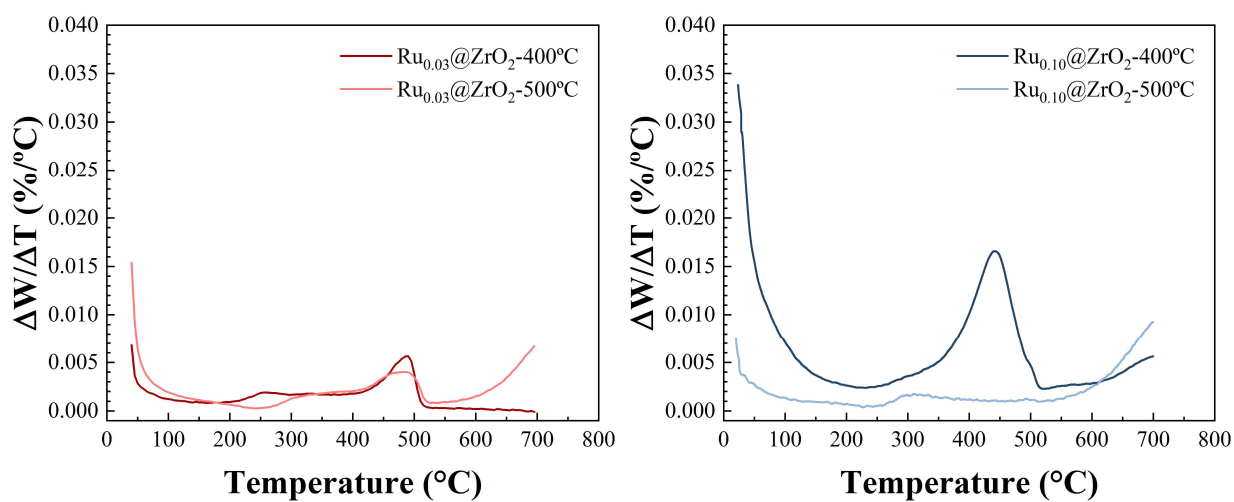

Figure S5: Derivative TGA curves of the Ru<sub>x</sub>@ZrO<sub>2</sub> catalysts calcined at 400 and 500 °C.

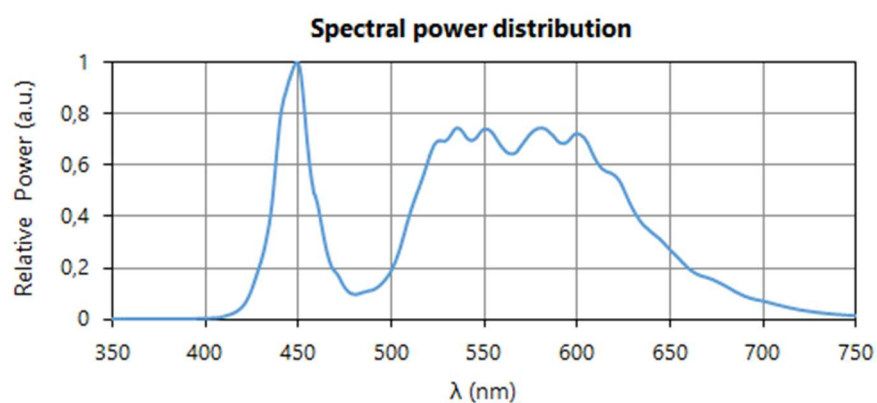

Figure S6: Spectral power distribution of ultra-high power LEDM-5500 White HP - Pyroistech S.L.
